# Supplementary material
Source: publisher figshare collection journal article supplement (https://tandf.figshare.com/articles/dataset/_/14715220)

# The glacial geomorphology of sub-Antarctic Marion Island

Rudolph, E.M.<sup>1</sup>, Hedding, D.W.<sup>2</sup>, Nel, W.<sup>3</sup>

<sup>1</sup>Department of Geography, University of the Free State, South Africa

<sup>2</sup>Department of Geography, University of South Africa, South Africa

<sup>3</sup>Department of Geography and Environmental Science, University of Fort Hare, South Africa

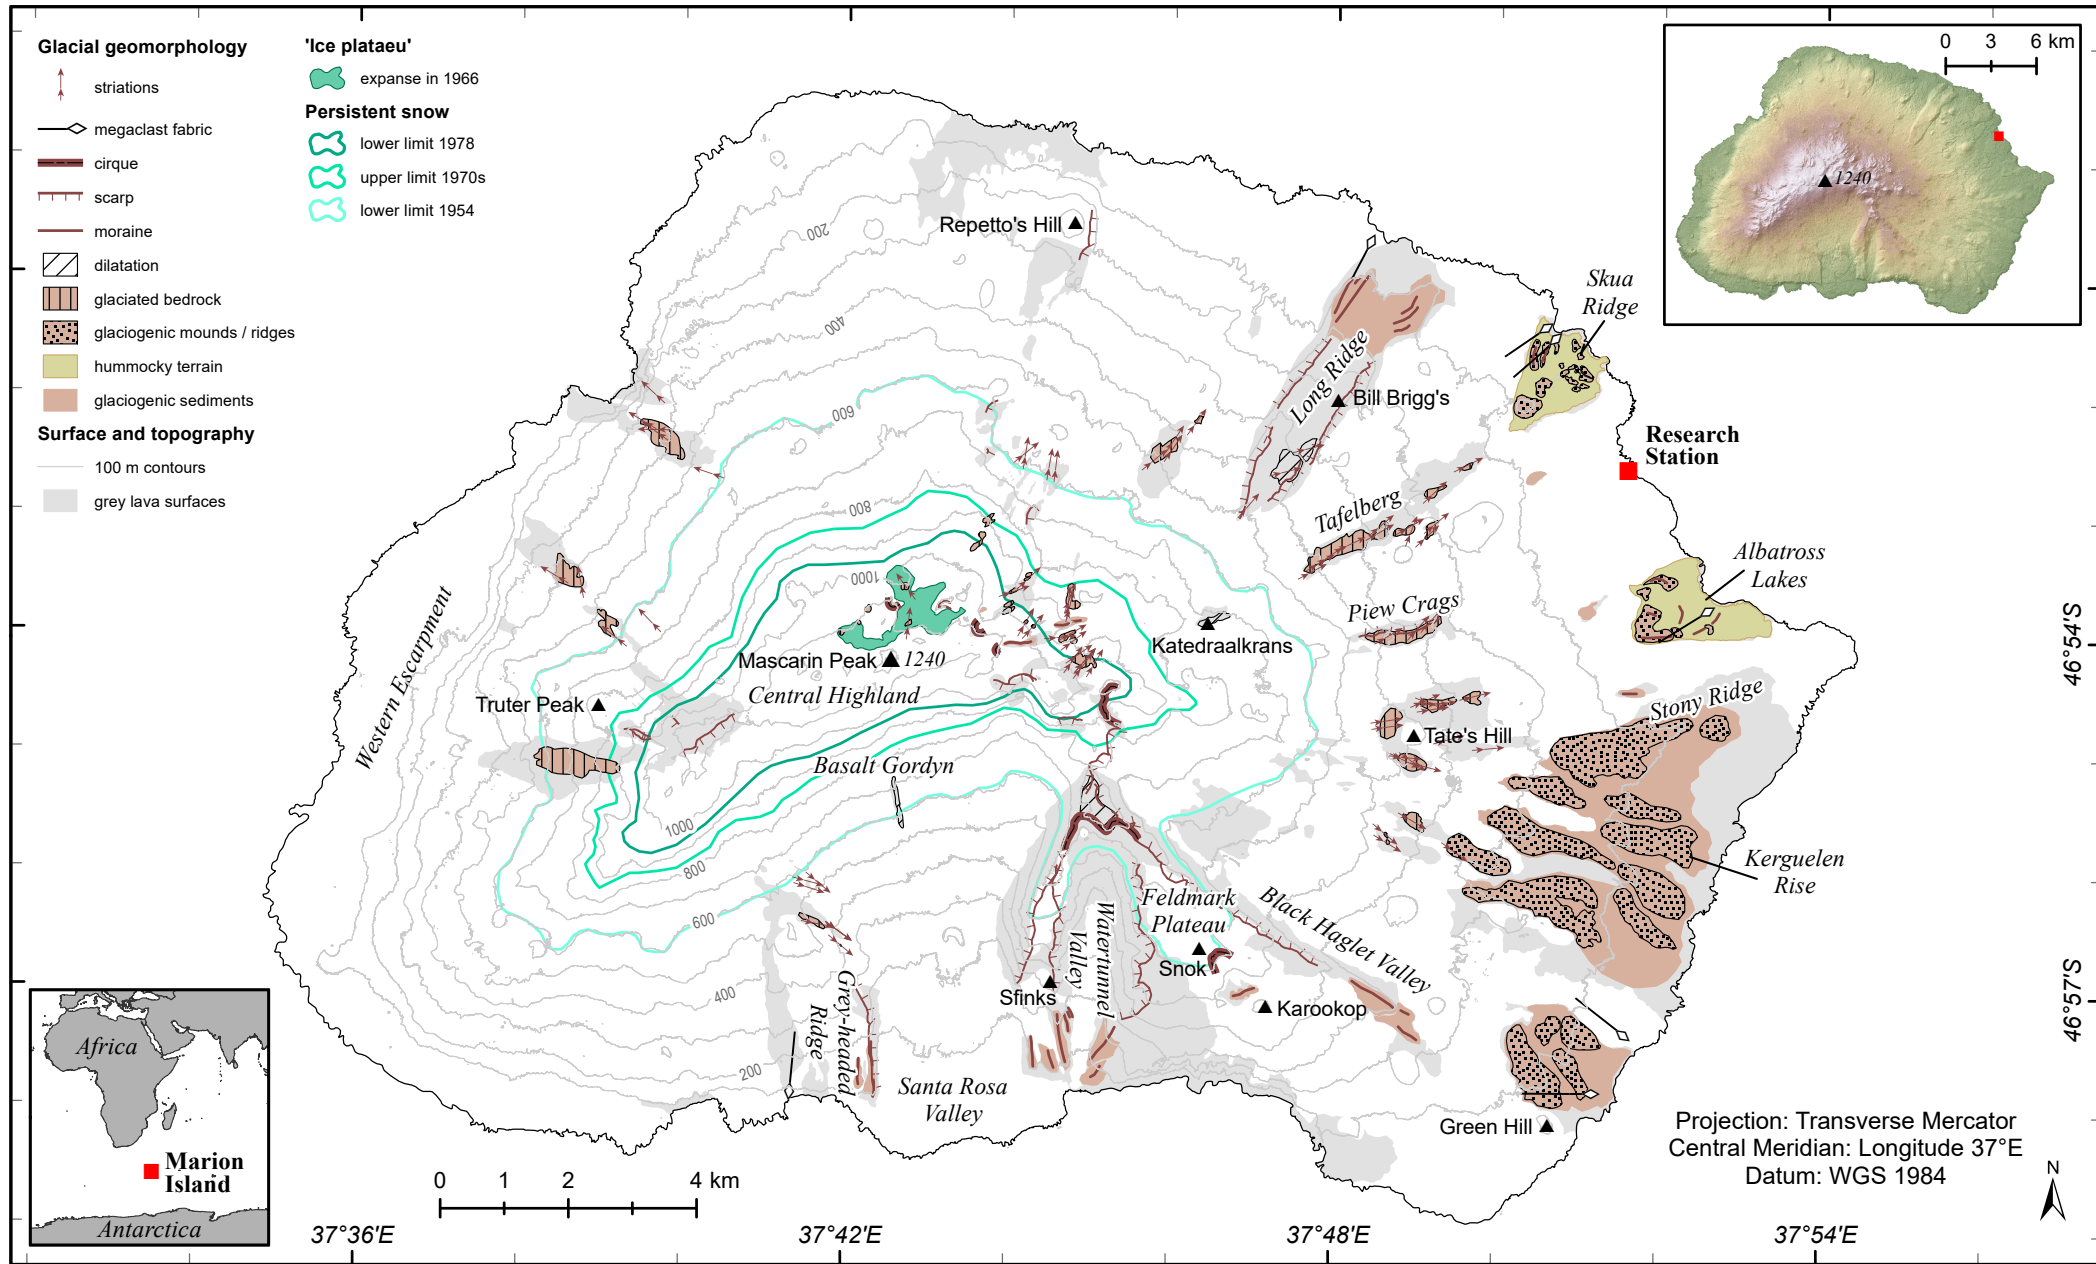

Supplement: Supplementary file 1 [file 2]
